# Supplementary material for: Escherichia coli rpoB Mutants Have Increased Evolvability in Proportion to Their Fitness Defects
Source: PubMed Central journal article supplement — Mol Biol Evol. 2010 Jan 27;27(6):1338–47. doi: 10.1093/molbev/msq024 (PMC2872623; doi:10.1093/molbev/msq024), 2010-01-27
Supplement: msq024_1.pdf [file msq024_1.pdf]

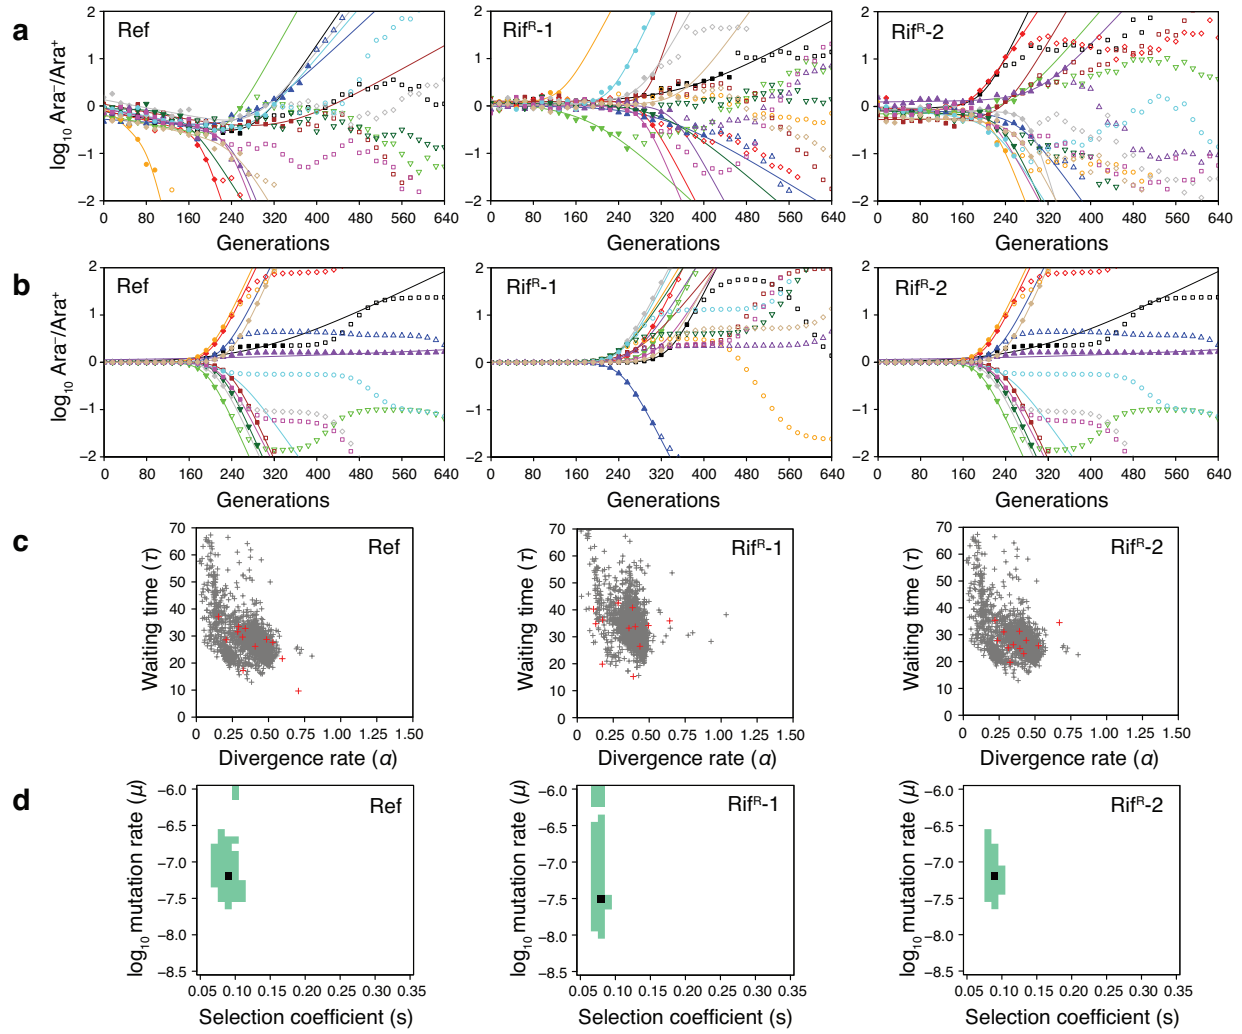

**Supplementary Figure 1.** Single-step evolvability inferred from marker ratio divergence trajectories for test strains Ref, Rif<sup>R</sup>-1, and Rif<sup>R</sup>-2. See Figure 1 of the main text for a description of each panel and the symbols used.

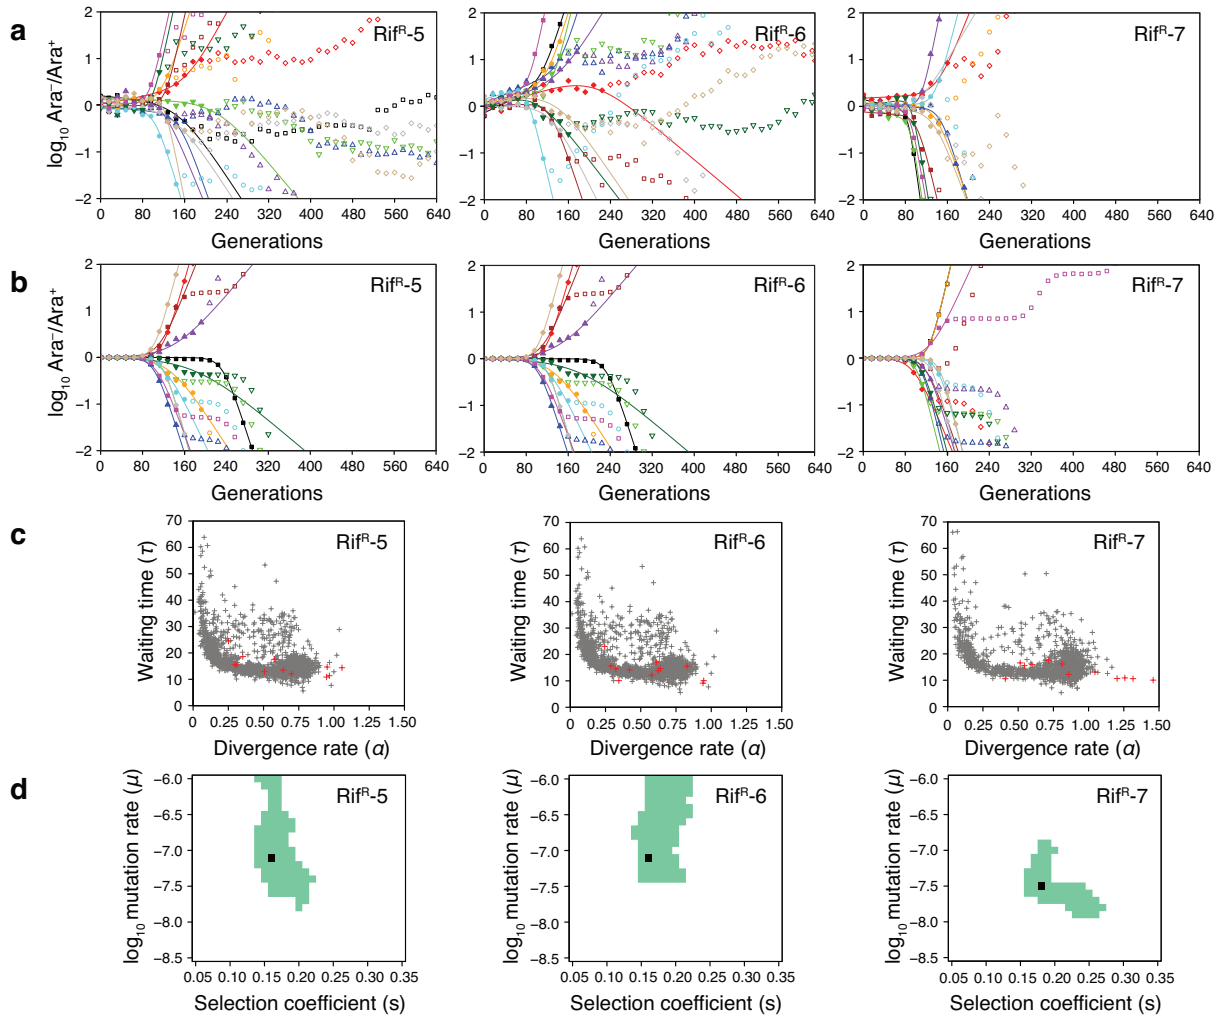

**Supplementary Figure 2.** Single-step evolvability inferred from marker ratio divergence trajectories for test strains Rif<sup>R</sup>-5, Rif<sup>R</sup>-6, and Rif<sup>R</sup>-7. See Figure 1 of the main text for a description of each panel and the symbols used. The Rif<sup>R</sup>-5 and Rif<sup>R</sup>-6 simulated curves are identical because these sets of experimental trajectories agree best with simulations at the same underlying  $\mu$  and  $s$  parameters.
